# Supplementary material
Source: Springer Nature journal article supplement (https://www.springermedizin.de/resource/supplementary/12935_2007_184_MOESM2_ESM.pdf/9541300)

A

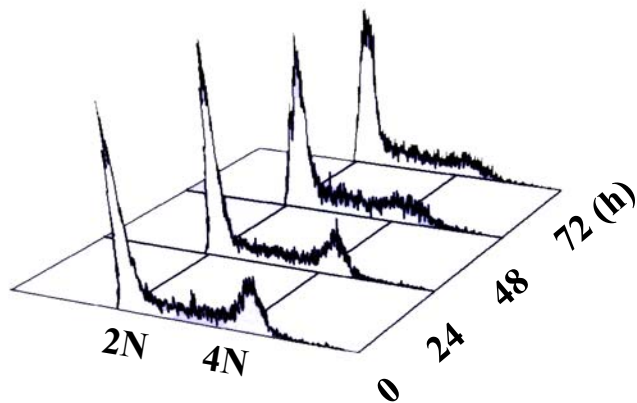

B (%)  
Percentages of G1, S,  
and G2 phase cells

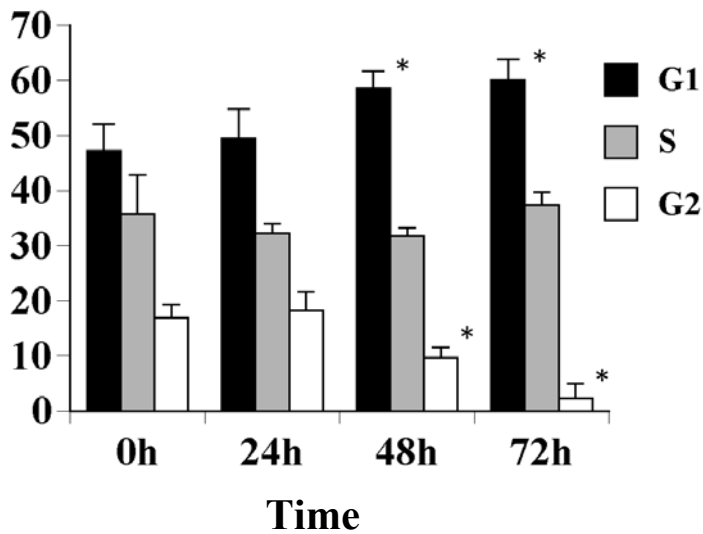

Supplement: MOESM2 [file 9541300]
